# Supplementary material
Source: Elsevier journal article supplement (https://www.sciencedirect.com/science/article/pii/S1885585721003728)
Supplement: mmc1 [file S1885585721003728:mmc1.pdf]

## MATERIAL ADICIONAL

### DEFINICIONES

Se utilizaron los criterios diagnósticos de la guía europea de síncope de la siguiente manera: síncope vasovagal (SVV) se definió como: *a)* síncope desencadenado por dolor, miedo o bipedestación y asociado con pródromos típicos como palidez, sudoración o náuseas; *b)* síncope ocurrido durante o inmediatamente después de la micción, una estimulación gastrointestinal como tragar o defecar, toser, estornudar, después del ejercicio u otros factores desencadenantes como reír o tocar instrumentos de viento, y *c)* SVV inducida durante el test en tabla basculante (TTB), caracterizada por una presentación clínica que reproduce hipotensión/bradicardia. El síncope hipotensivo ortostático (SHO) se definió como: *a)* el síncope ocurrido tras ponerse de pie si se documentó hipotensión ortostática, o *b)* cuando se documentó hipotensión ortostática progresiva durante el TTB (con presíncope o síncope o sin síntomas). Se definió síncope de etiología desconocida (SED) cuando las pruebas cardiacas realizadas previamente descartaron la etiología cardiaca y el paciente refirió que los episodios de síncope no fueron precipitados por angustia emocional o estrés ortostático y no se asociaron con un pródromo típico, o cuando el TTB fue positivo pero no reprodujo el síncope que refirió el paciente<sup>1,2</sup>. El tiempo de evolución de la historia sincopal se define como el tiempo transcurrido entre el primer episodio de síncope sufrido por el paciente y el día de la evaluación en la unidad de síncope.

### TEST EN TABLA BASCULANTE

El TTB fue solicitado por el médico remitente y se realizó a todos los pacientes después de un ayuno de al menos 6 h, en una sala tranquila, entre las 9.00 y las 14.00. Se utilizó el protocolo italiano<sup>3</sup>. El TTB se consideró positivo para SVV cuando tanto la hipotensión refleja como la bradicardia se asociaron con el síncope inducido durante el TTB y se consideró que reproducía la presentación clínica del paciente. Se informó de que el TTB fue positivo para SHO cuando se indujo una respuesta

hipotensiva progresiva (con o sin síncope y presíncope) de acuerdo con los criterios descritos por la última iteración de la guía europea de síncope<sup>1,2</sup>.

## **BIBLIOGRAFÍA**

1. Brignole M, Moya A, de Lange FJ, et al. 2018 ESC Guidelines for the diagnosis and management of syncope. *Eur Heart J*. 2018;39:1883-1948.
2. Moya A, Sutton R, Ammirati JJ, et al. Guidelines for the diagnosis and management of syncope (version 2009). *Eur Heart J*. 2009;30:2631-2671.
3. Bartoletti A, Alboni P, Ammirati F, et al. "The Italian Protocol": a simplified head-up tilt testing potentiated with oral nitroglycerin to assess patients with unexplained syncope. *Europace*. 2000;2:339-342.
